# Supplementary material for: Cucurbitacin B Suppresses Hyperglycemia Associated with a High Sugar Diet and Promotes Sleep in Drosophila melanogaster
Source: PubMed Central journal article supplement — Mol Cells. 2021 Feb 5;44(2):68–78. doi: 10.14348/molcells.2021.2245 (PMC7941002; doi:10.14348/molcells.2021.2245), 2021-02-05
Supplement: molce-44-2-68_Supple.pdf [file molce-44-2-68_Supple.pdf]

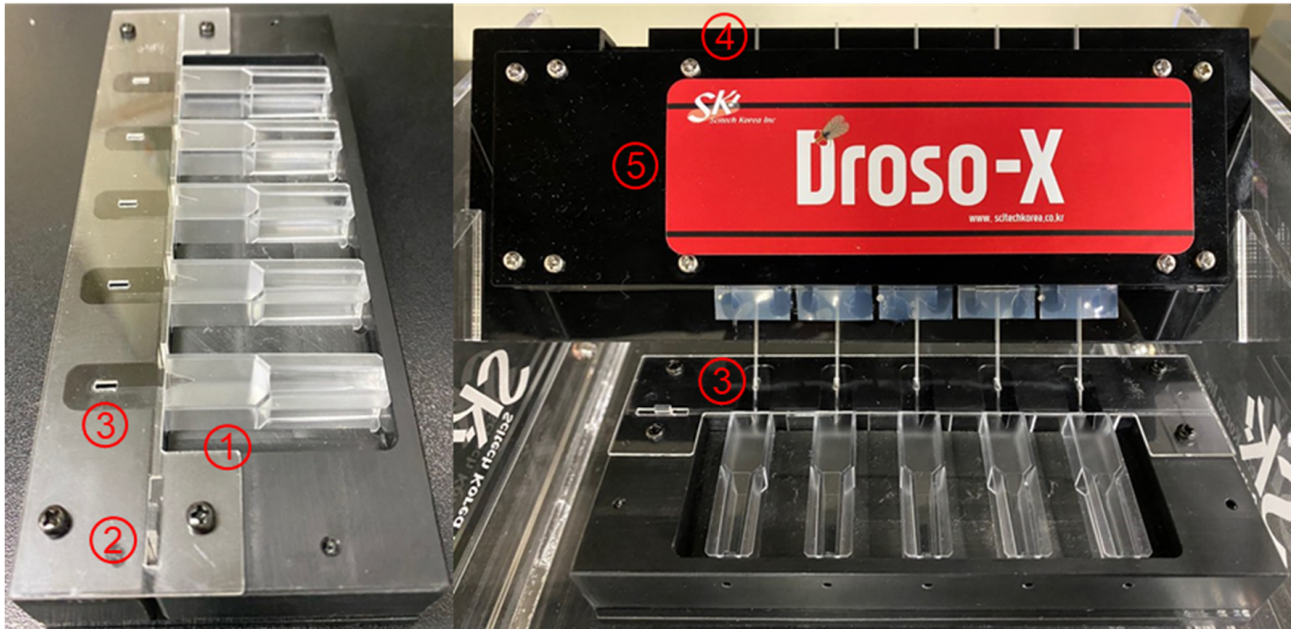

**Supplementary Fig. S1. Details of Droso-X machine.** ① A cuvette which houses a single fly. ② A blocker which can be controlled to start feeding. ③ A hole through which the glass tube passes. ④ A glass tube which contains food. ⑤ Droso-X machine with sensors.
